# Supplementary material for: Optimization of Resistance Spot Welding parameters in steel sheets via Genetic Algorithm Implementation
Source: Research Square preprint supplement (doi:10.21203/rs.3.rs-6613611/v1), 2025-05-14
Supplement: Supplementary file 1 [file 752133dea45baddf46f80ba8.docx]

**Table 2:** Recommended practices of RSW joint in low carbon steel sheets

| **Sl. No.** | TH  **(mm)** | **(bar)** | **(Cycles)** | **(kA)** | **(Cycles)** | **(Cycles)** |
| --- | --- | --- | --- | --- | --- | --- |
| 01 | 1 – 1.5 | 3.5 | 40 | 12 | 12 | 15 |
| Thickness (), Electrode pressure (), Squeeze Time (), Weld Current (, Weld Time (, WN dia. (), quench/cool time () | | | | | | |
