# Supplementary material for: Optimization of Resistance Spot Welding parameters in steel sheets via Genetic Algorithm Implementation
Source: Research Square preprint supplement (doi:10.21203/rs.3.rs-6613611/v1), 2025-05-14
Supplement: Supplementary file 2 [file 8482d74a3fae6cc65bf48184.docx]

**Appendix-1**

**ANOVA Table For Failure Load**

| **Source** | **Sum of Squares** | **df** | **Mean Square** | **F-value** | **p-value** |
| --- | --- | --- | --- | --- | --- |
| **Model** | 1.60E+08 | 11 | 1.45E+07 | 114.49 | < 0.0001 |
| T | 1.46E+07 | 1 | 1.46E+07 | 114.93 | < 0.0001 |
| I | 3.91E+07 | 1 | 3.91E+07 | 308.18 | < 0.0001 |
| P | 2.17E+06 | 1 | 2.17E+06 | 17.07 | 0.001 |
| Z-Z | 6.74E+07 | 1 | 6.74E+07 | 531.05 | < 0.0001 |
| TI | 7.79E+06 | 1 | 7.79E+06 | 61.37 | < 0.0001 |
| IP | 2.96E+06 | 1 | 2.96E+06 | 23.32 | 0.0003 |
| IZ | 3.92E+06 | 1 | 3.92E+06 | 30.88 | < 0.0001 |
| PZ | 8.28E+05 | 1 | 8.28E+05 | 6.53 | 0.0229 |
| T² | 8.77E+05 | 1 | 8.77E+05 | 6.91 | 0.0198 |
| I² | 3.41E+06 | 1 | 3.41E+06 | 26.85 | 0.0001 |
| P² | 2.43E+06 | 1 | 2.43E+06 | 19.16 | 0.0006 |
| **Residual** | 1.78E+06 | 14 | 1.27E+05 |  |  |
| Lack of Fit | 1.40E+06 | 8 | 1.76E+05 | 2.82 | 0.1115 |

**ANOVA Table for Elongation**

| **Source** | **Sum of Squares** | **df** | **Mean Square** | **F-value** | **p-value** |
| --- | --- | --- | --- | --- | --- |
| **Model** | 3718.12 | 13 | 286.01 | 258.82 | < 0.0001 |
| T | 2.29 | 1 | 2.29 | 2.07 | 0.176 |
| I | 2113.02 | 1 | 2113.02 | 1912.14 | < 0.0001 |
| P | 3.14 | 1 | 3.14 | 2.84 | 0.1178 |
| Z-Z | 707.59 | 1 | 707.59 | 640.33 | < 0.0001 |
| TI | 24.9 | 1 | 24.9 | 22.53 | 0.0005 |
| TP | 223.11 | 1 | 223.11 | 201.9 | < 0.0001 |
| TZ | 190.4 | 1 | 190.4 | 172.3 | < 0.0001 |
| IP | 15.62 | 1 | 15.62 | 14.13 | 0.0027 |
| IZ | 1.18 | 1 | 1.18 | 1.07 | 0.3213 |
| PZ | 16.96 | 1 | 16.96 | 15.35 | 0.002 |
| T² | 36.36 | 1 | 36.36 | 32.9 | < 0.0001 |
| I² | 37.5 | 1 | 37.5 | 33.93 | < 0.0001 |
| P² | 34.7 | 1 | 34.7 | 31.4 | 0.0001 |
| **Residual** | 13.26 | 12 | 1.11 |  |  |
| Lack of Fit | 7.76 | 6 | 1.29 | 1.41 | 0.3432 |
