# Supplementary material for: Optimization of Resistance Spot Welding parameters in steel sheets via Genetic Algorithm Implementation
Source: Research Square preprint supplement (doi:10.21203/rs.3.rs-6613611/v1), 2025-05-14
Supplement: Supplementary file 3 [file a91800f734260a834d38339e.docx]

**Table 8**: Comparison of Predicted and Experimental Results

| SI. No | ELp  **(mm)** | ELa  **(mm)** | E  (**%**) | F. Lp  **(N)** | F. La  (**N**) | E  (**%**) | Material Type |
| --- | --- | --- | --- | --- | --- | --- | --- |
| 1 | 34.3 | 34.4 | 0.3 | 10385.7 | 10400.3 | 0.14 | IFHS |
| 2 | 35.9 | 34.2 | -0.5 | 10428.5 | 10463.7 | 0.03 | IFHS |
| 3 | 24.7 | 27.4 | 11 | 5839.3 | 5863.6 | 0.41 | M.S |
| 4 | 25.4 | 27.4 | 7.9 | 5885.0 | 5786.9 | -1.6 | M.S |
