# Supplementary material for: Optimization of Resistance Spot Welding parameters in steel sheets via Genetic Algorithm Implementation
Source: Research Square preprint supplement (doi:10.21203/rs.3.rs-6613611/v1), 2025-05-14
Supplement: Supplementary file 4 [file bc5a1422ced1d82dfe243560.docx]

**Table 6**: Optimized decision variables for IFHS steel using GA

| SI. No | T  (cycles) | I  (KA) | P  (bar) | FL  (N) | EL  (mm) |
| --- | --- | --- | --- | --- | --- |
| 1 | 25 | 15 | 4.9 | 10385.7 | 34.3 |
| 2 | 25 | 15 | 5.4 | 10428.5 | 35.9 |
| 3 | 25 | 15 | 5.5 | 10405.8 | 35.9 |
| 4 | 25 | 15 | 5.2 | 10464.1 | 35.4 |
| 5 | 25 | 15 | 4.9 | 10404.6 | 34.5 |
| 6 | 25 | 15 | 4.8 | 10379.0 | 34.2 |
| 7 | 25 | 15 | 5.2 | 10464.1 | 35.4 |
| 8 | 25 | 15 | 5.2 | 10461.5 | 35.6 |
| 9 | 25 | 15 | 5.2 | 10464.1 | 35.4 |
| 10 | 24.7 | 15 | 5.3 | 10416.2 | 35.4 |
