# Supplementary material for: Optimization of Resistance Spot Welding parameters in steel sheets via Genetic Algorithm Implementation
Source: Research Square preprint supplement (doi:10.21203/rs.3.rs-6613611/v1), 2025-05-14
Supplement: Supplementary file 5 [file c4d7e69d2c2df06bc1401519.docx]

|  | **Chemical composition (wt%)** | | | | | | | **Engineering properties** | | |
| --- | --- | --- | --- | --- | --- | --- | --- | --- | --- | --- |
| **Steel alloy** | **C** | **Mn** | **Si** | **S** | **P** | **Al** | **N** | **EL%** | **YS (MPa)** | **UTS (MPa)** |
| **Mild Steel** | 0.15 | 0.60 | 0.13 | 0.04 | 0.05 | 0.04 | 0.0052 | 27 | 280 | 410 |
| **IFHS 350** | 0.004 | 0.40 | 0.01 | 0.012 | 0.05 | 0.02 | 0.0018 | 40 | 220 | 450 |
| Elongation percentage (**EL%**), Yield Strength (**YS**), Ultimate Tensile Strength ( | | | | | | | | | | |

Table 1: Chemical and Mechanical properties of steel materials being welded
