# Supplementary material for: Optimization of Resistance Spot Welding parameters in steel sheets via Genetic Algorithm Implementation
Source: Research Square preprint supplement (doi:10.21203/rs.3.rs-6613611/v1), 2025-05-14
Supplement: Supplementary file 6 [file ce61bf8153d6e014f647c9ef.docx]

**Table 4**: DOE developed as per D-optimal design for fabricating RSW joints for both material types

| SI. No | T | I | P | Z | FL | EL |
| --- | --- | --- | --- | --- | --- | --- |
| 1 | 0 | 1 | -1 | 1 | 4750 | 16 |
| 2 | -1 | 1 | 1 | -1 | 9950 | 30 |
| 3 | -1 | 1 | 1 | 1 | 4570 | 14 |
| 4 | -1 | -1 | 1 | -1 | 3685 | 10 |
| 5 | 1 | -1 | -1 | 1 | 5750 | 1 |
| 6 | 1 | -1 | -1 | -1 | 8050 | 7 |
| 7 | 1 | 1 | -1 | -1 | 9250 | 28 |
| 8 | -1 | -1 | -1 | -1 | 4650 | 23 |
| 9 | 0 | -1 | -1 | -1 | 5973 | 12 |
| 10 | -1 | 1 | 1 | 1 | 4700 | 15 |
| 11 | 1 | 1 | 1 | -1 | 10065 | 36 |
| 12 | -1 | 1 | 0 | -1 | 9734 | 38 |
| 13 | -1 | 0 | -1 | -1 | 5920 | 28 |
| 14 | 1 | 1 | 0 | 1 | 5900 | 28 |
| 15 | 0 | 0 | 0 | 1 | 2600 | 6 |
| 16 | -1 | 1 | -1 | -1 | 9300 | 40 |
| 17 | -1 | -1 | 0 | 1 | 2750 | 3 |
| 18 | 0 | 0 | 0 | 1 | 2700 | 4 |
| 19 | 1 | -1 | 1 | 1 | 3524 | 7 |
| 20 | 1 | -1 | 0 | -1 | 8000 | 12 |
| 21 | 1 | -1 | 1 | 1 | 3528 | 8 |
| 22 | -1 | 1 | -1 | 1 | 4535 | 18 |
| 23 | -1 | -1 | 0 | 1 | 2550 | 3 |
| 24 | 1 | -1 | 1 | -1 | 7250 | 12 |
| 25 | 1 | 1 | 0 | 1 | 6500 | 30 |
| 26 | 1 | 1 | 1 | -1 | 9500 | 35 |
