# Supplementary material for: Optimization of Resistance Spot Welding parameters in steel sheets via Genetic Algorithm Implementation
Source: Research Square preprint supplement (doi:10.21203/rs.3.rs-6613611/v1), 2025-05-14
Supplement: Supplementary file 7 [file e2eaa5d67f7ee6a868eeff0b.docx]

**Table 3**: Parameter range for Design of Experiments

| **Factors** | **Continuous Factors** | **Range (J) (coded values)** |
| --- | --- | --- |
| **T** | Weld-Time (Cycles) | 5 (-1) – 25 (1) |
| **I** | Weld-Current (KA) | 5 (-1) – 15 (1) |
| **P** | Pressure (bar) | 4 (-1) – 6 (1) |
| **Categorical Factors** | | |
| **Z** | Material Types | Mild Steel – [1]  IFHS – [-1] |
