# Supplementary material for: Optimization of Resistance Spot Welding parameters in steel sheets via Genetic Algorithm Implementation
Source: Research Square preprint supplement (doi:10.21203/rs.3.rs-6613611/v1), 2025-05-14
Supplement: Supplementary file 8 [file ec2a12d52d19c364c8508693.docx]

**Table 7**: Optimized decision variables for IFHS steel using GA

| SI. No | T  (cycles) | I  (KA) | P  (bar) | FL  (N) | EL  (mm) |
| --- | --- | --- | --- | --- | --- |
| 1 | 25 | 15 | 4.45 | 5839.3 | 24.7 |
| 2 | 25 | 15 | 4.52 | 5885.0 | 25.4 |
| 3 | 25 | 15 | 4.59 | 5917.3 | 25.9 |
| 4 | 25 | 15 | 4.60 | 5919.6 | 26.0 |
| 5 | 25 | 15 | 4.66 | 5945.8 | 26.5 |
| 6 | 25 | 15 | 4.74 | 5967.6 | 27.1 |
| 7 | 25 | 15 | 4.78 | 5973.3 | 27.3 |
| 8 | 25 | 15 | 4.81 | 5977.6 | 27.6 |
| 9 | 25 | 15 | 5 | 5980.6 | 29.5 |
| 10 | 25 | 15 | 5.2 | 5981.0 | 28.2 |
