# Supplementary material for: Optimization of Resistance Spot Welding parameters in steel sheets via Genetic Algorithm Implementation
Source: Research Square preprint supplement (doi:10.21203/rs.3.rs-6613611/v1), 2025-05-14
Supplement: Supplementary file 9 [file f5ed9a6c0ccc6512cc104cfe.docx]

**Table 5**: Developed quadratic regression models for FL and EL

| **Developed regression model** | **SST** | **MSM** | **F-model** |  |  |  | **Flof** |
| --- | --- | --- | --- | --- | --- | --- | --- |
| EL (mm) = 11.4 + 0.34 * T + 9.9 * I -0.46 * P -5.9 * Z + 1.2 * T*I + 4.2 * T*P + 3.1 * T*Z + 1.1 * I*P -0.24 * I*Z + 1.1 * P*Z + 4.2 * T2 + 4.8 * I2 -2.9 * P2 | 3718.12 | 286 | 258.8 | 0.99 | 0.99 | 0.97 | 1.41 |
| F.L (N) = 4610.7 + 843.1*T + 1345.6 * I -381.1 * P - 1801.9 * Z - 656.6 * T*I + 428 * I*P - 432.4 * I*Z -232.6*P*Z+651.4 *T2 + 1410.2 * I2 - 766.85 * P2 | 1.6× 108 | 14.5× 106 | 114.5 | 0.99 | 0.98 | 0.96 | 2.82 |
| Total sum of squares of errors (**SST**), Mean sum of squares of errors (**MSm**) | | | | | | | |
